# Supplementary material for: Influence of Auditory Stimulation on the Physical Work Output of Adults Who Are Severely Retarded.
Source: Royal Society of Chemistry journal article supplement (doi:10.1039/c5cc00215j), 1991-01-01
Supplement: c5cc00215j1.pdf [file c5cc00215j1.pdf]

## Supporting Information

### On the existence and characterization of molecular electrides

*Verònica Postils, Marc Garcia-Borràs, Miquel Solà, Josep M. Luis\* and Eduard Matito\**

\* Institut de Química Computacional i Catàlisi (IQCC), Univ. Girona, Campus de Montilivi s/n, Girona, Spain. Tel: +34 972 418 357; E-mail: [josepm.luis@udg.edu](mailto:josepm.luis@udg.edu); [ematito@gmail.com](mailto:ematito@gmail.com).

#### Contents

---

|                                                         |            |
|---------------------------------------------------------|------------|
| <b>COMPUTATIONAL DETAILS .....</b>                      | <b>S1</b>  |
| <b>TCNQLi<sub>2</sub> .....</b>                         | <b>S2</b>  |
| <b>TCNQNa<sub>2</sub> .....</b>                         | <b>S3</b>  |
| <b>Li@calix[4]pyrrole .....</b>                         | <b>S4</b>  |
| <b>Li···NCH .....</b>                                   | <b>S5</b>  |
| <b>Li···HCN .....</b>                                   | <b>S6</b>  |
| <b>Li@B<sub>10</sub>H<sub>14</sub> .....</b>            | <b>S7</b>  |
| <b>e<sup>-</sup>@C<sub>60</sub>F<sub>60</sub> .....</b> | <b>S8</b>  |
| <b>LINEAR AND NONLINEAR OPTICAL PROPERTIES .....</b>    | <b>S9</b>  |
| <b>IONIZATION POTENTIALS .....</b>                      | <b>S9</b>  |
| <b>REFERENCES .....</b>                                 | <b>S10</b> |

## Computational Details

### Geometry optimization

All geometry and single-point calculations have been performed using the Gaussian09 suite of programs.<sup>1</sup> Geometry optimizations employed the density functional theory (DFT) Becke's three-parameter nonlocal exchange and Lee-Yang-Parr 1988 nonlocal correlation functional (B3LYP)<sup>2</sup> functional and 6-31+G(d) basis set.<sup>3</sup> In order to ensure an accurate account of the molecular geometry, cutoffs on forces and the stepsize have been tightened;<sup>a</sup> to improve the description of the wavefunction, the self-consistent field (SCF) convergence has also been tightened to  $1 \cdot 10^{-9}$  a.u., and the grid to compute two-electron integrals and their derivatives has been augmented.<sup>b</sup> These thresholds were applied to all systems excepting for e-@C<sub>60</sub>F<sub>60</sub>, whose geometry was taken from Ref. 4 and the thresholds of convergence for the SCF procedure were not tightened due to its prominent molecular size. However, the accuracy of this calculation was assessed by other means (*vide infra*).

### Topological analysis and characterization of electrides

The topological quantum theory of atoms in molecules (QTAIM),<sup>5</sup> electron localization function (ELF)<sup>6</sup> and Laplacian of the electron density<sup>5</sup> analyses were repeated at the same geometry for all the molecules but e-@C<sub>60</sub>F<sub>60</sub> using aug-cc-pVDZ Dunning basis set<sup>7</sup> in order to corroborate the results found. In addition, for TCNQLi<sub>2</sub> and TCNQNa<sub>2</sub> molecules additional computations at higher ab initio levels (namely, CISD and MP2 calculations in conjunction with the aug-cc-pVDZ basis set) were performed. In all cases, the qualitative results remained the same.

QTAIM and Laplacian calculations used the AIMPAC<sup>8</sup> and AIMAll<sup>9</sup> packages and the ToPMoD<sup>10</sup> Package developed by Bernard Silvi and coworkers was used to compute the values of the ELF. In addition, the calculation of the electron delocalization and localization<sup>11</sup> indices was done using the results from the previous programs and the *Electron Sharing Indices Program for 3D Molecular Space Partition (ESI-3D)* developed in our group.<sup>12</sup>

The single-point calculation of the e-@C<sub>60</sub>F<sub>60</sub> species was done using the basis of Simon et al. (used originally for the geometry optimization) that employed four s and four p functions placed in the center of the cage. In order to rule out the possibility of a basis set artifact, we performed an additional calculation using basis sets not explicitly located in the center of the structure. Namely, we placed sixty groups of three sp functions at 2.6 Å of the center of the cage, mimicking a smaller C<sub>60</sub> structure encapsulated in the cage. Both analyses of the QTAIM structure provided a NNA in the center of the cage, as well as similar pictures of ELF and the Laplacian, thus confirming the validity of the methodology employed in Ref. 4.

In the following pages we collect the full topological analyses performed in this communication.

---

<sup>a</sup> We used the *verytight* option in G09 package that sets the following convergence thresholds:  $1 \cdot 10^{-6}$  and  $4 \cdot 10^{-6}$  a.u. for force's root mean square (RMS) and displacement's RMS values, respectively.

<sup>b</sup> We used the *ultrafine* option in G09 package that sets a (99, 590) *pruned* grid.

## TCNQLi<sub>2</sub>

**Figure S1.** [top left] Topological analysis of the electron density including: the atomic positions (see labeled atoms), the bond (BCP) and ring (RCP) critical points (small spheres in grey), and the non-nuclear attractor (NNA; in red). [top right] ELF=0.75 isosurface picture indicating atomic core basins (small red spheres), valence basins (light grey) and the relevant basins for the present study (marked in green tone). [bottom]  $\nabla^2\rho=-0.001$  isosurface values.

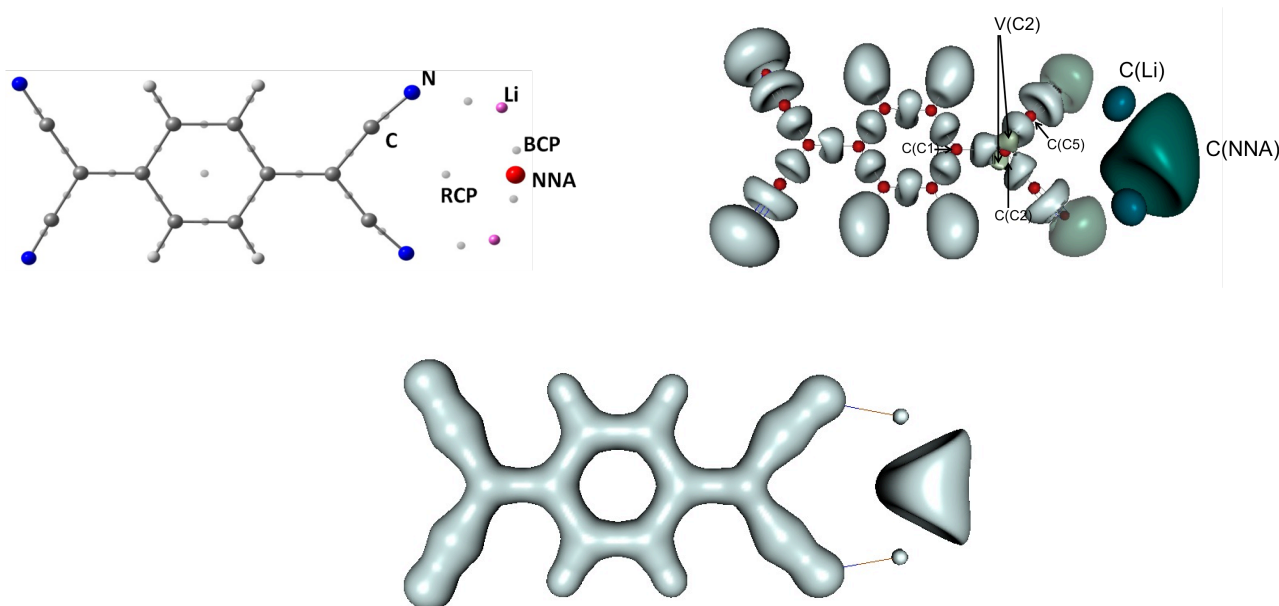

**Table S1a.** QTAIM and Laplacian analyses, including the distance of the lithium atoms to the NNA, ( $|\vec{r}_{(NNA-Li)}|$ ), the values of the density ( $\rho(\Omega)$ ) and the Laplacian of the electron density ( $\nabla^2\rho$ ) at the  $\Omega$  position, electron population of  $\Omega$  ( $N(\Omega)$ ), localization (LI) and delocalization ( $\delta$ ) indices and percentage of electron localization (%LI) from the total electron population. Atomic units employed.

| TCNQLi <sub>2</sub> | $\Omega$ | $ \vec{r}_{(NNA-Li)} $ | $\rho(\Omega)$      | $\nabla^2\rho$       | $N(\Omega)$ | LI   | %LI | $\delta(\text{Li},\text{NNA})$ | $\delta(\text{N},\text{NNA})$ |
|---------------------|----------|------------------------|---------------------|----------------------|-------------|------|-----|--------------------------------|-------------------------------|
| B3LYP               | NNA      | 3.083                  | $9.41\cdot 10^{-3}$ | $-7.37\cdot 10^{-3}$ | 0.52        | 0.28 | 51  | 0.20                           | 0.05                          |
|                     | Li       |                        | $1.31\cdot 10^{+1}$ | $-1.70\cdot 10^{+4}$ | 2.23        | 2.02 | 91  |                                |                               |
| UMP2                | NNA      | 3.117                  | $9.75\cdot 10^{-3}$ | $-7.87\cdot 10^{-3}$ | 0.70        | 0.46 | 67  | 0.16                           | 0.06                          |
|                     | Li       |                        | $1.32\cdot 10^{+1}$ | $-1.70\cdot 10^{+4}$ | 2.16        | 2.00 | 93  |                                |                               |
| CISD                | NNA      | 3.147                  | $9.51\cdot 10^{-3}$ | $-7.60\cdot 10^{-3}$ | 0.71        | 0.49 | 69  |                                |                               |
|                     | Li       |                        | $1.31\cdot 10^{+1}$ | $-1.70\cdot 10^{+4}$ | 2.15        | 2.00 | 93  |                                |                               |

**Table S1b.** Analysis of the ELF basins,  $\Omega$ , including the electron population,  $N(\Omega)$ , the variance of the electron population,  $\sigma^2(\Omega)$ , the percentage of the basin's fluctuation,  $\% \lambda_F(\Omega)$ , and the contribution analysis of each ELF basin to the covariance with other ELF basins. Atomic units employed.

| $\Omega$ | $N(\Omega)$ | $\sigma^2(\Omega)$ | $\% \lambda_F(\Omega)$ | Contribution Analysis ( $\geq 10\%$ ) |
|----------|-------------|--------------------|------------------------|---------------------------------------|
| C(NNA)   | 0.92        | 0.20               | 22                     | C(Li) (18%), V(N,Li) (18%)            |
| C(Li)    | 2.02        | 0.08               | 4                      | V(N,Li) (50%), C(NNA) (50%)           |
| V(C2)    | 0.45        | 0.38               | 84                     | V(C5,C2) (24%), V(C1,C2) (21%)        |

## TCNQNa<sub>2</sub>

**Figure S2.** [top left] Topological analysis of the electron density including: the atomic positions (see labeled atoms), the bond (BCP) and ring (RCP) critical points (small spheres in grey), and the non-nuclear attractor (NNA; in red). [top right] ELF=0.75 isosurface picture indicating atomic core basins (small red spheres), valence basins (light grey) and the relevant basins for the present study (marked in green tone). [bottom]  $\nabla^2\rho=-0.001$  isosurface values.

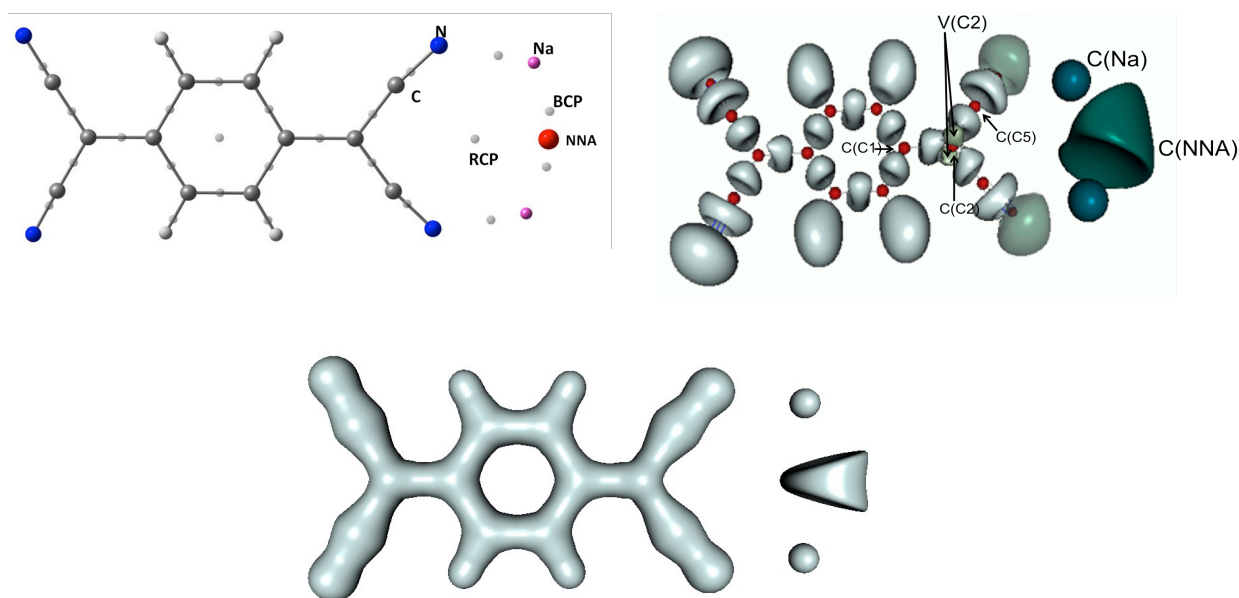

**Table S2a.** QTAIM and Laplacian analyses, including the distance of the sodium atoms to the NNA, ( $|\vec{r}_{(NNA-Li)}|$ ), the values of the density ( $\rho(\Omega)$ ) and the Laplacian of the electron density ( $\nabla^2\rho$ ) at the  $\Omega$  position, electron population of  $\Omega$  ( $N(\Omega)$ ), localization (LI) and delocalization ( $\delta$ ) indices and percentage of electron localization (%LI) from the total electron population. Atomic units employed.

| TCNQNa <sub>2</sub> | $\Omega$ | $ \vec{r}_{(NNA-Li)} $ | $\rho(\Omega)$      | $\nabla^2\rho$       | $N(\Omega)$ | LI    | %LI | $\delta(\text{Li},\text{NNA})$ | $\delta(\text{N},\text{NNA})$ |
|---------------------|----------|------------------------|---------------------|----------------------|-------------|-------|-----|--------------------------------|-------------------------------|
| B3LYP               | NNA      | 3.525                  | $6.14\cdot 10^{-3}$ | $-3.67\cdot 10^{-3}$ | 0.23        | 0.05  | 22  | 0.16                           | 0.02                          |
|                     | Na       |                        | $8.04\cdot 10^{+2}$ | $-1.78\cdot 10^{+7}$ | 10.39       | 10.10 | 97  |                                |                               |
| UMP2                | NNA      | 3.429                  | $6.70\cdot 10^{-3}$ | $-4.50\cdot 10^{-3}$ | 0.44        | 0.19  | 43  | 0.22                           | 0.02                          |
|                     | Na       |                        | $8.04\cdot 10^{+2}$ | $-1.78\cdot 10^{+7}$ | 10.29       | 10.05 | 98  |                                |                               |

**Table S2b.** Analysis of the ELF basins,  $\Omega$ , including the electron population,  $N(\Omega)$ , the variance of the electron population,  $\sigma^2(\Omega)$ , the percentage of the basin's fluctuation,  $\% \lambda_F(\Omega)$ , and the contribution analysis of each ELF basin to the covariance with other ELF basins. Atomic units employed.

| $\Omega$ | $N(\Omega)$ | $\sigma^2(\Omega)$ | $\% \lambda_F(\Omega)$ | Contribution Analysis ( $\geq 10\%$ ) |
|----------|-------------|--------------------|------------------------|---------------------------------------|
| C(NNA)   | 0.89        | 0.26               | 29                     | C(Na) (33%)                           |
| C(Na)    | 10.03       | 0.14               | 1                      | V(N,Na) (33%), C(NNA) (67%)           |
| V(C2)    | 0.44        | 0.38               | 86                     | V(C5,C2) (24%), V(C1,C2) (21%)        |



## Li@calix[4]pyrrole

**Figure S3.** [top left] Topological analysis of the electron density including: the atomic positions (see labeled atoms), the bond (BCP) and ring (RCP) critical points (small spheres in grey), the cage critical points (small spheres in yellow) and the non-nuclear attractor (NNA; in red). [top right] ELF=0.75 isosurface picture indicating atomic core basins (small red spheres), valence basins (light grey) and the relevant basins for the present study (marked in green tone). [bottom]  $\nabla^2\rho=-0.001$  isosurface values.

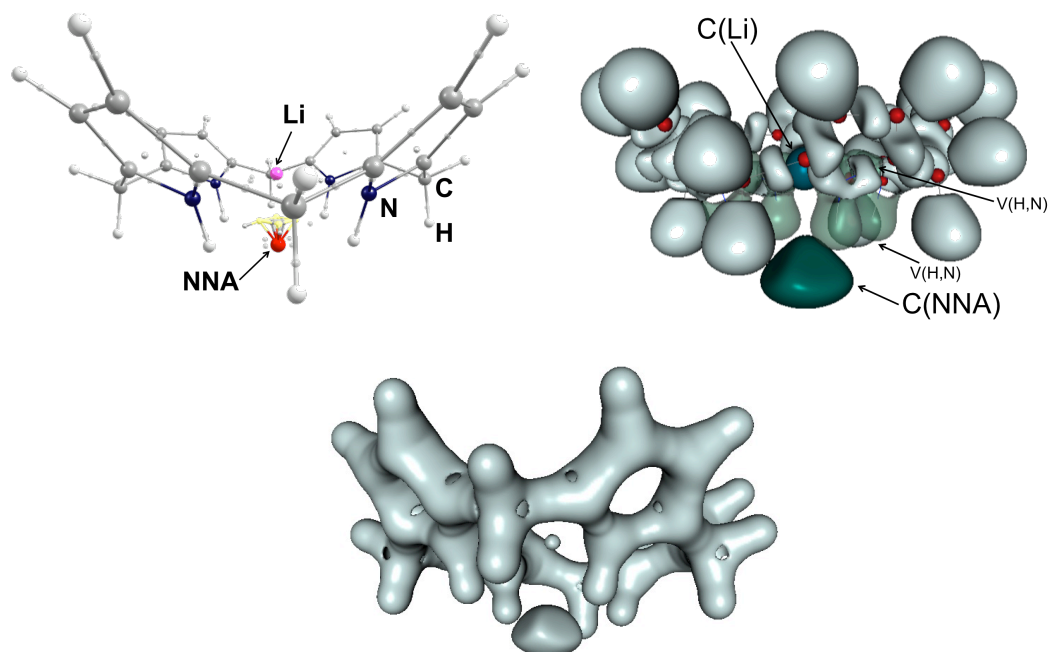

**Table S3a.** QTAIM and Laplacian analyses, including the distance of the lithium atom to the NNA, ( $|\vec{r}_{(NNA-Li)}|$ ), the values of the density ( $\rho(\Omega)$ ) and the Laplacian of the electron density ( $\nabla^2\rho$ ) at the  $\Omega$  position, electron population of  $\Omega$  ( $N(\Omega)$ ), localization (LI) and delocalization ( $\delta$ ) indices and percentage of electron localization (%LI) from the total electron population. Atomic units employed.

| Li@calix[4]pyrrole ( $\Omega$ ) | $ \vec{r}_{(NNA-Li)} $ | $\rho(\Omega)$       | $\nabla^2\rho$        | $N(\Omega)$ | LI   | %LI | $\delta(\text{Li},\text{NNA})$ | $\delta(\text{N},\text{NNA})$ |
|---------------------------------|------------------------|----------------------|-----------------------|-------------|------|-----|--------------------------------|-------------------------------|
| NNA                             | 2.998                  | $5.61 \cdot 10^{-3}$ | $-3.67 \cdot 10^{-3}$ | 0.15        | 0.02 | 13  | 0.004                          | 0.01                          |
| Li                              |                        | $1.31 \cdot 10^{+1}$ | $-1.78 \cdot 10^{+7}$ | 2.11        | 1.98 | 94  |                                |                               |

**Table S3b.** Analysis of the ELF basins,  $\Omega$ , including the electron population,  $N(\Omega)$ , the variance of the electron population,  $\sigma^2(\Omega)$ , the percentage of the basin's fluctuation,  $\% \lambda_F(\Omega)$ , and the contribution analysis of each ELF basin to the covariance with other ELF basins. Atomic units employed.

| $\Omega$ | $N(\Omega)$ | $\sigma^2(\Omega)$ | $\% \lambda_F(\Omega)$ | Contribution Analysis ( $\geq 10\%$ ) |
|----------|-------------|--------------------|------------------------|---------------------------------------|
| C(NNA)   | 0.63        | 0.34               | 54                     | V(H,N) (17%)                          |
| C(Li)    | 2.03        | 0.08               | 4                      | V(N, Li) (20%), C(NNA) (20%)          |

## Li...NCH

**Figure S4.** [top left] Topological analysis of the electron density including: the atomic positions (see labeled atoms) and the bond (BCP) critical points (small spheres in grey). [top right] ELF=0.75 isosurface picture indicating atomic core basins (small red spheres), valence basins (light grey) and the relevant basins for the present study (marked in green tone). [bottom]  $\nabla^2\rho=-0.001$  isosurface values.

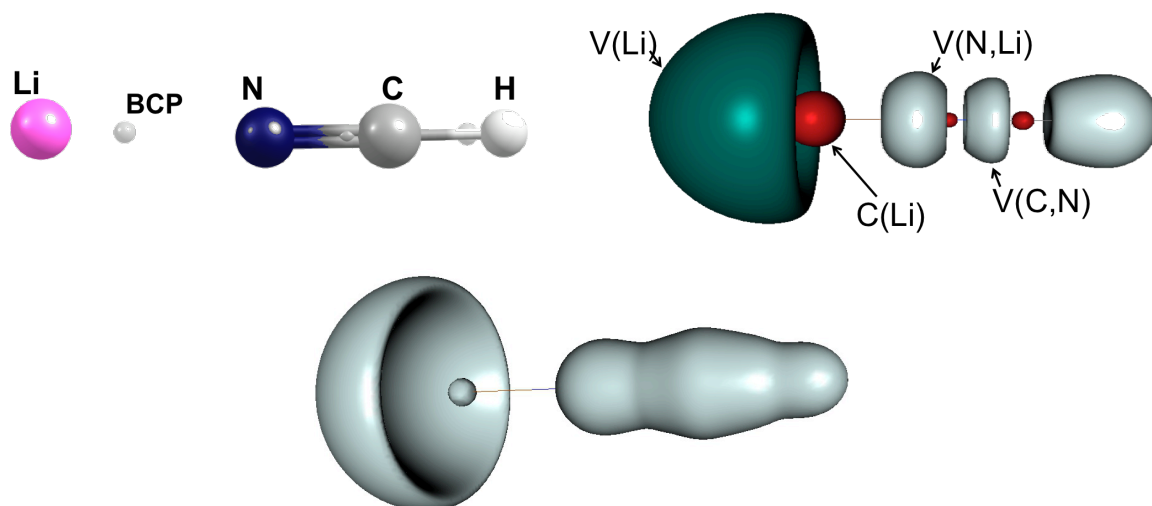

**Table S4a.** Analysis of the ELF basins,  $\Omega$ , including the electron population,  $N(\Omega)$ , the variance of the electron population,  $\sigma^2(\Omega)$ , the percentage of the basin's fluctuation,  $\% \lambda_F(\Omega)$ , and the contribution analysis of each ELF basin to the covariance with other ELF basins. Atomic units employed.

| $\Omega$ | $N(\Omega)$ | $\sigma^2(\Omega)$ | $\% \lambda_F(\Omega)$ | Contribution Analysis ( $\geq 10\%$ )      |
|----------|-------------|--------------------|------------------------|--------------------------------------------|
| V(Li)    | 0.91        | 0.16               | 18                     | V(N, Li) (46%), C(Li) (38%), V(C, N) (15%) |
| C(Li)    | 2.02        | 0.08               | 4                      | V(N, Li) (37%), V(Li) (62%)                |

## Li...HCN

**Figure S5.** [top left] Topological analysis of the electron density including: the atomic positions (see labeled atoms) and the bond (BCP) critical points (small spheres in grey). [top right] ELF=0.75 isosurface picture indicating atomic core basins (small red spheres), valence basins (light grey) and the relevant basins for the present study (marked in green tone). [bottom]  $\nabla^2\rho=-0.002$  isosurface values.

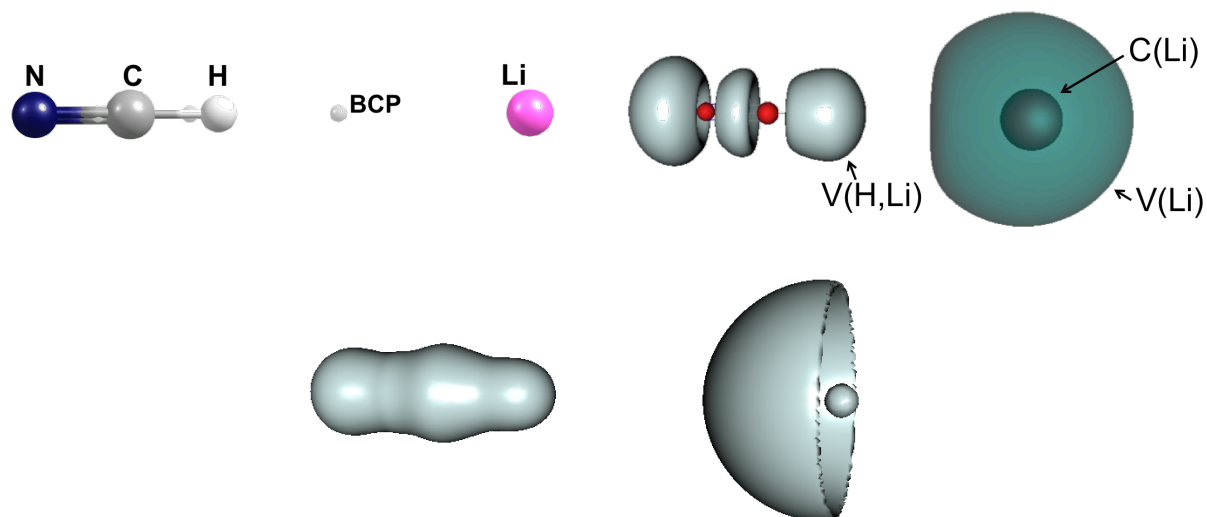

**Table S5a.** Analysis of the ELF basins,  $\Omega$ , including the electron population,  $N(\Omega)$ , the variance of the electron population,  $\sigma^2(\Omega)$ , the percentage of the basin's fluctuation,  $\% \lambda_F(\Omega)$ , and the contribution analysis of each ELF basin to the covariance with other ELF basins. Atomic units employed.

| $\Omega$ | $N(\Omega)$ | $\sigma^2(\Omega)$ | $\% \lambda_F(\Omega)$ | Contribution Analysis ( $\geq 10\%$ ) |
|----------|-------------|--------------------|------------------------|---------------------------------------|
| V(Li)    | 0.95        | 0.11               | 12                     | C(Li) (75%), V(H,C) (25%)             |
| C(Li)    | 2.01        | 0.06               | 3                      | V(Li) (98%)                           |

## Li@B<sub>10</sub>H<sub>14</sub>

**Figure S6.**[top left] Topological analysis of the electron density including: the atomic positions (see labeled atoms), the bond (BCP) and ring (RCP) critical points (small spheres in grey) and the cage critical points (small spheres in yellow). [top right]  $\nabla^2\rho=-0.001$  isosurface values. [bottom] ELF=0.75 isosurface picture (left) and ELF=0.20 isosurface picture (center) indicating atomic core basins (small red spheres), valence basins (light grey) and the relevant basins for the present study (marked in green tone). (right) 2D contour plot of the ELF function.

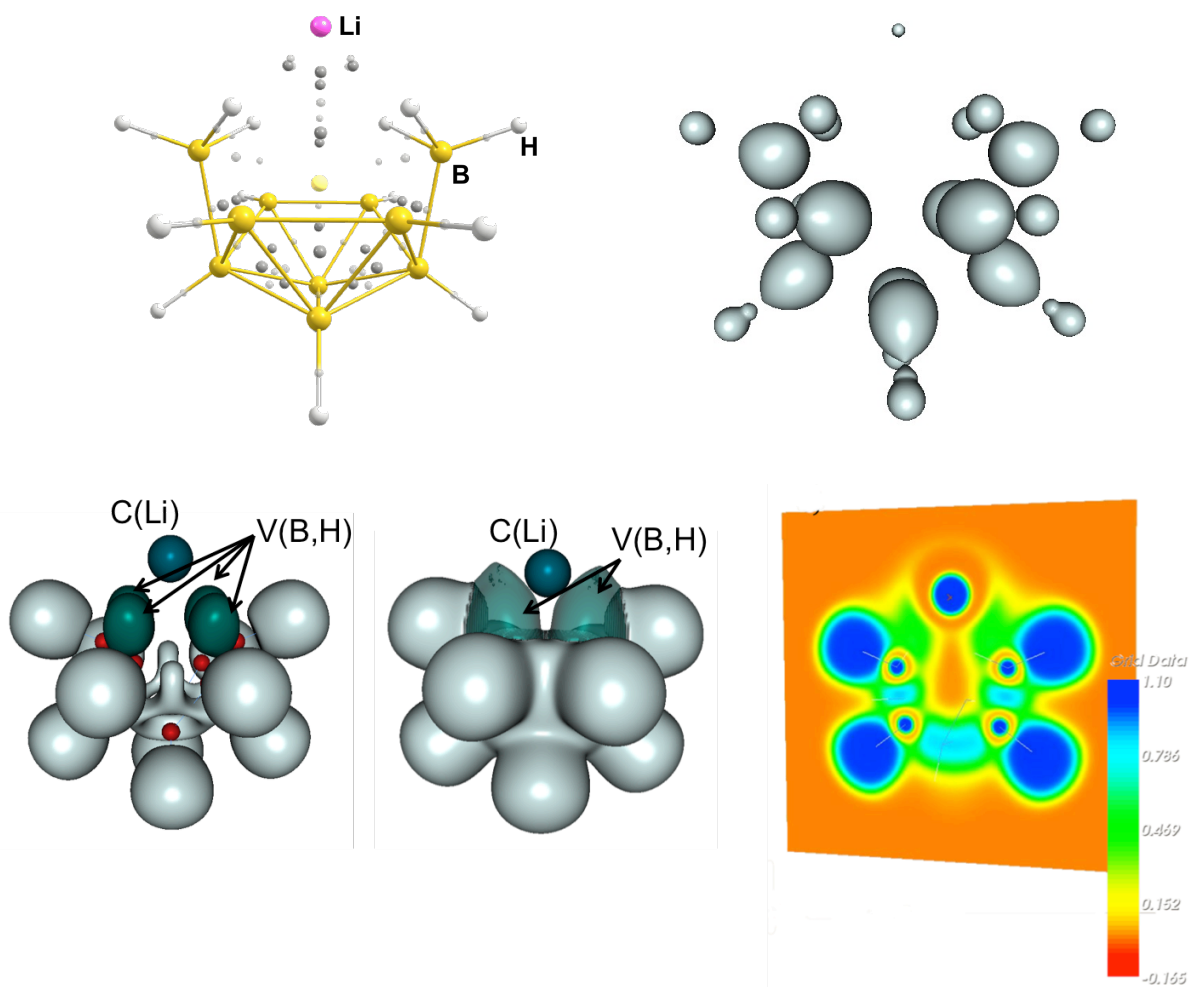

**Table S6a.** Analysis of the ELF basins,  $\Omega$ , including the electron population,  $N(\Omega)$ , the variance of the electron population,  $\sigma^2(\Omega)$ , the percentage of the basin's fluctuation,  $\%\lambda_F(\Omega)$ , and the contribution analysis of each ELF basin to the covariance with other ELF basins. Atomic units employed.

| $\Omega$ | $N(\Omega)$ | $\sigma^2(\Omega)$ | $\%\lambda_F(\Omega)$ | Contribution Analysis ( $\geq 10\%$ ) |
|----------|-------------|--------------------|-----------------------|---------------------------------------|
| C(Li)    | 2.02        | 0.06               | 3                     | V(B,H) (25%) each                     |
| V(B,H)   | 2.04        | 0.84               | 41                    | V(B,H) (14%), others not relevant     |

### e-@B<sub>10</sub>H<sub>14</sub>

**Figures S7.** [top left] Topological analysis of the electron density including: the atomic positions (see labeled atoms), the bond (BCP) and ring (RCP) critical points (small spheres in grey), the cage critical points (small spheres in yellow) and the non-nuclear attractor (NNA; in red). [top right] ELF=0.75 isosurface picture indicating valence basins (light grey) and the isolated-electron of the electride basin (marked in green). [bottom]  $\nabla^2\rho=-0.001$  isosurface values.

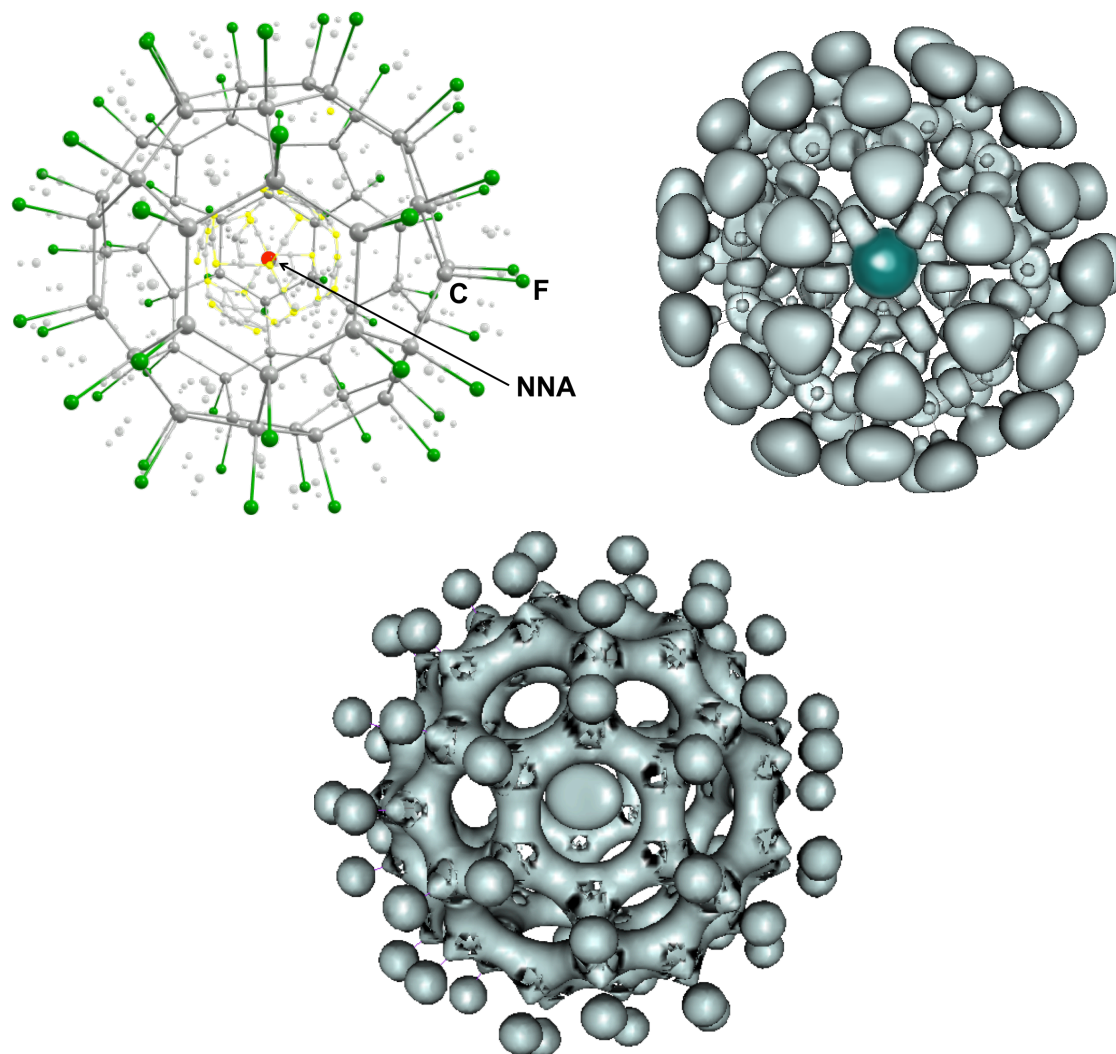

**Table S7a.** QTAIM and Laplacian analyses for the e-@C<sub>60</sub>F<sub>60</sub> including: the values of the density ( $\rho(\Omega)$ ) and the Laplacian of the electron density ( $\nabla^2\rho$ ) at the  $\Omega$  position, electron population of  $\Omega$  ( $N(\Omega)$ ), the localization (LI) index and the percentage of electron localization (%LI) from the total electron population. Atomic units employed.

| e-@C <sub>60</sub> F <sub>60</sub> ( $\Omega$ ) | $\rho(\Omega)$      | $\nabla^2\rho$       | $N(\Omega)$ | LI   | %LI |
|-------------------------------------------------|---------------------|----------------------|-------------|------|-----|
| NNA                                             | $1.74\cdot 10^{-3}$ | $-2.63\cdot 10^{-4}$ | 0.19        | 0.03 | 18  |

## Linear and Nonlinear Optical Properties

**Table S8.** Electronic contribution to linear and nonlinear optical properties (NLOP) for the molecules studied in this communication. <sup>a</sup>Data from Ref. 13. <sup>b</sup>Data from Ref. 4. <sup>c</sup>Data from Ref. 14. <sup>d</sup>Values computed at the UB3LYP/aug-cc-pVDZ level of theory.

| properties                | TCNQLi <sub>2</sub> <sup>a</sup> | TCNQNa <sub>2</sub> <sup>a</sup> | Li@Calix <sup>a</sup> | Li@B <sub>10</sub> H <sub>14</sub> <sup>a</sup> | Li...HCN <sup>c</sup> | HCN...Li <sup>c</sup> | Li <sub>2</sub><br>(S=0) | Li <sub>2</sub><br>(S=0) |
|---------------------------|----------------------------------|----------------------------------|-----------------------|-------------------------------------------------|-----------------------|-----------------------|--------------------------|--------------------------|
| $\alpha_{zz}$ (0;0)       |                                  |                                  |                       |                                                 | 212.6                 | 158.2                 | 263.2                    | 583.0                    |
| $\vec{\alpha}$ (0; 0)     | 371.9                            | 389.7                            | 381.6                 | 150.3                                           | 181.9                 | 239.1                 | 198.5                    | 340.0                    |
| $\beta_{zzz}$ (0;0,0)     |                                  |                                  |                       |                                                 | -2791                 | -3640                 |                          |                          |
| $\gamma_{zzzz}$ (0;0,0,0) |                                  |                                  |                       |                                                 |                       |                       | 1.2·10 <sup>6</sup>      | 9.2·10 <sup>5</sup>      |
| $\gamma_{  }$ (0; 0,0,0)  | 1.4·10 <sup>6</sup>              | 1.3·10 <sup>6</sup>              | 4.8·10 <sup>6</sup>   | 4.8·10 <sup>5</sup>                             |                       |                       |                          |                          |

## Ionization Potentials

**Table S9.** Ionization Potentials for the molecules studied in this work computed at the B3LYP/aug-cc-pVDZ level of theory. <sup>a</sup>Computed at the level of theory of Ref. 4.

| molecule                                        | PI (eV)            |
|-------------------------------------------------|--------------------|
| TCNQLi <sub>2</sub>                             | (S=1 → S=1/2) 6.32 |
|                                                 | (S=1 → S=3/2) 7.80 |
| TCNQNa <sub>2</sub>                             | (S=1 → S=1/2) 6.11 |
|                                                 | (S=1 → S=3/2) 7.47 |
| Li@Calix                                        | (S=1/2 → S=0) 3.82 |
| Li@B <sub>10</sub> H <sub>14</sub>              | (S=1/2 → S=0) 6.39 |
| e-@C <sub>60</sub> F <sub>60</sub> <sup>a</sup> | (S=1/2 → S=0) 3.99 |
| Li...HCN                                        | (S=1/2 → S=0) 5.98 |
| HCN...Li                                        | (S=1/2 → S=0) 4.35 |

## References

- [1.] M. J. FRISCH, G. W. TRUCKS, H. B. SCHLEGEL, G. E. SCUSERIA, M. A. ROBB, J. R. CHEESEMAN, G. SCALMANI, V. BARONE, B. MENNUCCI, G. A. PETERSSON, H. NAKATSUJI, M. CARICATO, X. LI, H. P. HRATCHIAN, A. F. IZMAYLOV, J. BLOINO, G. ZHENG, J. L. SONNENBERG, M. HADA, M. EHARA, K. TOYOTA, R. FUKUDA, J. HASEGAWA, M. ISHIDA, T. NAKAJIMA, Y. HONDA, O. KI-TAO, H. NAKAI, T. VREVEN, J. A. MONTGOMERY, JR., J. E. PERALTA, F. OGLIARO, M. BEARPARK, J. J. HEYD, E. BROTHERS, K. N. KUDIN, V. N. STAROVEROV, R. KOBAYASHI, J. NORMAND, K. RAGHAVACHARI, A. RENDELL, J. C. BURANT, S. S. IYENGAR, J. TOMASI, M. COSSI, N. REGA, J. M. MILLAM, M. KLENE, J. E. KNOX, J. B. CROSS, V. BAKKEN, C. ADAMO, J. JARAMILLO, R. GOMPERTS, R. E. STRATMANN, O. YAZYEV, A. J. AUSTIN, R. CAMMI, C. POMELLI, J. W. OCHTERSKI, R. L. MARTIN, K. MOROKUMA, V. G. ZAKRZEWSKI, G. A. VOTH, P. SALVADOR, J. J. DANNENBERG, S. DAPPRICH, A. D. DANIELS, Á. FARKAS, J. B. FORESMAN, J. V. ORTIZ, J. CIOŚŁOWSKI, and D. J. FOX, Gaussian 09 Revision A.1, Gaussian Inc. Wallingford CT 2009.
- [2.] A. D. BECKE, *J. Chem. Phys.* **98**, 5648 (1993).
- [3.] R. DITCHFIELD, W. J. HEHRE, and J. A. POPLE, *J. Chem. Phys.* **54**, 724 (1971). ; W. J. HEHRE, R. DITCHFIELD, and J. A. POPLE, *J. Chem. Phys.* **56**, 2257 (1972). ; P. C. HARIHARAN and J. A. POPLE, *Theor. Chim. Acta (Berlin)* **28**, 213 (1973). ; M. M. FRANCL, W. J. PIETRO, W. J. HEHRE, J. S. BINKLEY, M. S. GORDON, D. J. DEFREES, and J. A. POPLE, *J. Chem. Phys.* **77**, 3654 (1982).
- [4.] Y.-F. WANG, Z.-R. LI, D. WU, C.-C. SUN, and F.-L. GU, *J. Comput. Chem.* **31**, 195 (2010).
- [5.] R. F. W. BADER and T. T. NGUYEN-DANG, Quantum Theory of Atoms in Molecules –Dalton Revisited, in *Advances in Quantum Chemistry*, volume 14, pp. 63–124, Academic Press, New York, 1981.
- [6.] A. D. BECKE and K. E. EDGECOMBE, *J. Chem. Phys.* **92**, 5397 (1990).
- [7.] R. A. KENDALL, T. H. DUNNING JR, and R. J. HARRISON, *J. Chem. Phys.* **96**, 6796 (1992).
- [8.] F. W. BIEGLER-KONIG, T. T. NGUYEN-DANG, Y. TAL, and R. F. W. BADER, *J. Phys. B: Atom. Molec. Phys.* **14**, 2739 (1981). ; F. W. BIEGLER-KÖNIG, R. F. BADER, and T.-H. TANG, *J. Comput. Chem.* **3**, 317 (1982).
- [9.] T. A. KEITH, AIMAll (Version 14.11.23), 2014, TK Gristmill Software, Overland Park KS, USA (aim.tkgristmill.com).
- [10.] S. NOURY, X. KROKIDIS, F. FUSTER, and B. SILVI, TopMoD package, 1997.
- [11.] E. MATITO and M. SOLÀ, *Coord. Chem. Rev.* **253**, 647 (2009); E. MATITO, M. DURAN, and M. SOLÀ, *J. Chem. Phys.* **122**, 014109 (2005); E. MATITO, M. SOLÀ, P. SALVADOR, and M. DURAN, *Faraday Discuss.* **135**, 325 (2007); F. FEIXAS, E. MATITO, M. DURAN, M. SOLÀ, and B. SILVI, *J. Chem. Theory Comput.* **6**, 2736 (2010).
- [12.] E. MATITO, ESI-3D: Electron Sharing Indices Program for 3D Molecular Space Partitioning; Institute of Computational chemistry and Catalysis, University of Girona, Catalonia, Spain, 2006.
- [13.] M. GARCIA-BORRÀS, M. SOLÀ, J. M. LUIS, and B. KIRTMAN, *J. Chem. Theory Comput.* **8**, 2688 (2012).
- [14.] W. CHEN, Z.-R. LI, D. WU, R.-Y. LI, and C.-C. SUN, *J. Phys. Chem. B* **109**, 601 (2005).
